# Supplementary material for: Patient Use and Experience With Online Access to Electronic Health Records in Norway: Results From an Online Survey
Source: PubMed Central journal article supplement (PMC7055829; doi:10.2196/16144), 2020-02-07
Supplement: jmir_v22i2e16144_app1.pdf [file jmir_v22i2e16144_app1.pdf]

# Spørreskjema til brukere av «Pasientjournal» på helsenorge.no

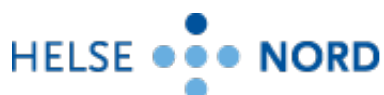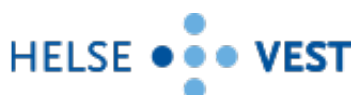

Til deg som har brukt tjeneste «Pasientjournal» på den nasjonale helseportalen helsenorge.no.

Dette er en ny tjeneste i Norge, og vi ønsker derfor å stille deg noen spørsmål slik at vi kan forbedre tjenesten. Vi ønsker å vite *hva du synes om tjenesten og hvordan du bruker den*. Vi trenger også litt bakgrunnsinformasjon om deg. Resultatene fra undersøkelsen vil brukes i rapporter og forskningsartikler.

Undersøkelsen er anonym, og det vil ikke være mulig å identifisere deg. Det tar omtrent 10–12 minutter å svare.

## 1) \* Hvordan vil du betegne din bruk av tjenesten «pasientjournal»?

- Jeg bruker den regelmessig
- Jeg bruker den ved behov
- Jeg har vært inne et par ganger for å se
- Dette var første gang

## 2) \* Hvordan var det å finne fram til tjenesten «pasientjournal» etter innlogging på helsenorge.no?

- Veldig enkelt
- Ganske enkelt
- Vanskelig
- Veldig vanskelig

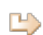

**3) \* Har du tatt kontakt med noen for å få hjelp til å finne fram?**

- Nei
- Ja, med 800Helse
- Ja, med prosjektet
- Ja, med helsepersonell
- Ja, med venner og kjente

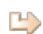

**4) \* Omtrent hvor mange dokumenter ser du i «pasientjournal» på helsenorge.no?**

- Flere enn 1000
- Mellom 500–999
- Mellom 100–499
- Mellom 50–99
- Under 50
- Ingen som jeg kunne se elektronisk

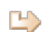

**5) \* Omtrent hvor stor andel av dokumentene har du åpnet («klikket på»)?**

- Alle (100 %) av dokumentene i lista
- De fleste (80 %–99 %)
- Over halvparten (50 %–79 %)
- Under halvparten (15 %–49 %)
- Noen få (under 15 %)

**6) \* Har du kontaktet behandler eller behandlingssted med spørsmål om din eller barns journal?**

- Ja, jeg har bedt om innsyn i eldre dokumenter
- Ja, jeg har meldt feil eller mangler i journalen
- Ja, jeg har bedt om forklaring på ting jeg ikke forstod
- Nei, det har ikke vært aktuelt
- Nei, det var vanskelig å finne ut av hvem jeg skulle kontakte

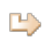

**7) \* Har du fått digital tilgang til eldre dokumenter?**

- Ja
- Delvis
- Nei

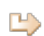

## 8) \* Hvor enig er du i følgende påstander

|                                                                                                            | Helt uenig            | Delvis uenig          | Delvis enig           | Helt enig             | Ikke aktuell          |
|------------------------------------------------------------------------------------------------------------|-----------------------|-----------------------|-----------------------|-----------------------|-----------------------|
| Jeg har hatt problemer med å lagre eller skrive ut dokumentene                                             | <input type="radio"/> | <input type="radio"/> | <input type="radio"/> | <input type="radio"/> | <input type="radio"/> |
| Noen dokumenter så ut til å være ufullstendige                                                             | <input type="radio"/> | <input type="radio"/> | <input type="radio"/> | <input type="radio"/> | <input type="radio"/> |
| Jeg synes det var vanskelig å forstå hva de ulike dokumentene handlet om uten å åpne selve dokumentet      | <input type="radio"/> | <input type="radio"/> | <input type="radio"/> | <input type="radio"/> | <input type="radio"/> |
| Jeg forstod det meste av det jeg leste                                                                     | <input type="radio"/> | <input type="radio"/> | <input type="radio"/> | <input type="radio"/> | <input type="radio"/> |
| Jeg synes det var vanskelig å forstå noen medisinske ord eller uttrykk                                     | <input type="radio"/> | <input type="radio"/> | <input type="radio"/> | <input type="radio"/> | <input type="radio"/> |
| Jeg trodde jeg skulle få tilgang til flere dokumenter enn det jeg fikk                                     | <input type="radio"/> | <input type="radio"/> | <input type="radio"/> | <input type="radio"/> | <input type="radio"/> |
| Jeg synes det var for mange dokumenter                                                                     | <input type="radio"/> | <input type="radio"/> | <input type="radio"/> | <input type="radio"/> | <input type="radio"/> |
| Jeg opplever at det er enklere å holde oversikt over min helsetilstand når jeg har tilgang til journalen   | <input type="radio"/> | <input type="radio"/> | <input type="radio"/> | <input type="radio"/> | <input type="radio"/> |
| Jeg mener at jeg er bedre forberedt til time / innleggelse etter at jeg tok i bruk «pasientjournal»        | <input type="radio"/> | <input type="radio"/> | <input type="radio"/> | <input type="radio"/> | <input type="radio"/> |
| Jeg synes det er lettere å kommunisere med helsepersonell etter at jeg tok i bruk «pasientjournal»         | <input type="radio"/> | <input type="radio"/> | <input type="radio"/> | <input type="radio"/> | <input type="radio"/> |
| Etter at jeg tok i bruk «pasientjournal», opplever jeg at jeg har en bedre forståelse av min helsetilstand | <input type="radio"/> | <input type="radio"/> | <input type="radio"/> | <input type="radio"/> | <input type="radio"/> |
| Jeg opplever at jeg kan være med og påvirke min behandling                                                 | <input type="radio"/> | <input type="radio"/> | <input type="radio"/> | <input type="radio"/> | <input type="radio"/> |
| Jeg opplever at jeg får mer ansvar for behandlingen                                                        | <input type="radio"/> | <input type="radio"/> | <input type="radio"/> | <input type="radio"/> | <input type="radio"/> |
| Jeg har blitt urolig over informasjon jeg har fått gjennom «pasientjournal»                                | <input type="radio"/> | <input type="radio"/> | <input type="radio"/> | <input type="radio"/> | <input type="radio"/> |
| Jeg opplever økt trygghet gjennom «pasientjournal»                                                         | <input type="radio"/> | <input type="radio"/> | <input type="radio"/> | <input type="radio"/> | <input type="radio"/> |
| Alt i alt synes jeg tjenesten fungerte tilfredsstillende                                                   | <input type="radio"/> | <input type="radio"/> | <input type="radio"/> | <input type="radio"/> | <input type="radio"/> |

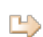

**9) \* Har du gjort noe av det følgende?**

|                                                                                  | Sjelden<br>eller<br>aldri | Noen<br>ganger        | Ofte                  |
|----------------------------------------------------------------------------------|---------------------------|-----------------------|-----------------------|
| Jeg bruker «pasientjournal» til å forberede meg til en time eller innleggelse    | <input type="radio"/>     | <input type="radio"/> | <input type="radio"/> |
| Jeg bruker «pasientjournal» til å slå opp informasjon jeg har fått fra behandler | <input type="radio"/>     | <input type="radio"/> | <input type="radio"/> |
| Jeg bruker «pasientjournal» til å følge med på behandlingen                      | <input type="radio"/>     | <input type="radio"/> | <input type="radio"/> |
| Jeg deler (viser) dokumenter fra «pasientjournal» med familie og venner          | <input type="radio"/>     | <input type="radio"/> | <input type="radio"/> |
| Jeg deler journaldokumenter med fastlegen min eller annet helsepersonell         | <input type="radio"/>     | <input type="radio"/> | <input type="radio"/> |

**10) \* Jeg ble oppmerksom på tjenesten «pasientjournal» gjennom**

- Min behandler eller annet helsepersonell
- Skriftlig informasjon på sykehuset/behandlingsstedet  Familie eller venner
- helsenorge.no  Medier (aviser, radio, TV, Facebook, etc.)
- Annet



**11) \* Tror du at du vil bruke «pasientjournal» seinere?**

- Ja
- Nei
- Vet ikke

**12) Begrunnelse:**

**13) \* Vil du anbefale tjenesten «pasientjournal» til andre?**

- Ja
- Nei
- Vet ikke

**14) Begunnelse:**

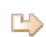

**15) \* Hvilken helseregion har du vært i kontakt med?**

- Helse Nord     Helse Vest     Helse Nord og Helse Vest

**16) \* Kjønn:**

- Kvinne     Mann

**17) \* Alder:**

- Under 24 år     25 - 34 år     35 - 44 år     45 - 54 år     55 - 64 år
- Over 65 år

**18) \* Høyeste fullførte utdanning:**

- Barneskole (6. eller 7. skoleår) / Folkeskolenivå
- Ungdomsskole (9. eller 10. skoleår) / Framhaldskole / Realskolenivå
- Videregående opplæring, yrkesfag
- Videregående opplæring, allmenfag
- Teknisk fagskole, arbeidsmarkedsopplæring
- Høgskole / Universitet 1-3 år (Bachelor, cand.mag, høgskolekandidat, sykepleier, lærer, ingeniør, osv)
- Høgskole / Universitet 4-5 år (Master, hovedfag, sivilingeniør, osv)
- Doktorgrad

**19) \* Har du helsefaglig utdanning og/eller arbeider du i helsesektoren?**

- Ja     Nei

**20) \* Har du oppsøkt lege i løpet av de siste 12 månedene? (dette inkluderer sykehusinnleggelser og legevakt, men IKKE tannlegetimer)**

- Ja, jeg har selv oppsøkt lege
- Ja, jeg har oppsøkt lege på vegne av andre
- Ingen ganger
- Vet ikke / ønsker ikke å svare

**21) Hvis ja, hvor mange ganger?**

**22) \* Hvordan er helsen din stort sett?**

- Svært god
- God
- Middels
- Dårlig
- Svært dårlig
- Vet ikke / ønsker ikke å svare

**23) Andre kommentarer:**
